# Supplementary material
Source: publisher figshare collection journal article supplement (https://diabetesjournals.figshare.com/ndownloader/files/24992915)
Supplement: Supplementary file 1 [file 24992915]

Rank	Drug	Signature Id	ID
1	BI-2536	LJP006_A549_24H:BRD-K64890080:10	BRD-K64890080
2	PD-184352	LJP005_HEPG2_24H:BRD-K05104363:3.33	BRD-K05104363
3	vorinostat	CPC007_A549_24H:BRD-K81418486:10.0	BRD-K81418486
4	BI-2536	LJP006_A549_24H:BRD-K64890080:1.11	BRD-K64890080
5	selumetinib	LJP006_HEPG2_24H:BRD-K57080016:10	BRD-K57080016
6	BRD-A17065207	CPC016_A549_24H:BRD-A17065207:10.0	BRD-A17065207
7	NVP-AUY922	LJP005_HEPG2_24H:BRD-K65182930:10	BRD-K65182930
8	crizotinib	LJP005_HS578T_24H:BRD-K78431006:10	BRD-K78431006
9	PD-0325901	LJP006_HEPG2_24H:BRD-K49865102:1.11	BRD-K49865102
10	CHIR-99021	LJP006_HS578T_24H:BRD-K16189898:3.33	BRD-K16189898
11	Daunorubicin hydrochloride	CPC003_PC3_6H:BRD-A68009927:10.0	BRD-A68009927
12	vorinostat	CPC005_A549_24H:BRD-K81418486:10.0	BRD-K81418486
13	Tyrphostin AG 1478	CPC006_A549_24H:BRD-K68336408:56.78	BRD-K68336408
14	Emetine Dihydrochloride Hydrate (74)	CPC006_HA1E_24H:BRD-K01976263:0.63	BRD-K01976263
15	trichostatin A	CPC011_A549_24H:BRD-A19037878:10.0	BRD-A19037878
16	pelitinib	LJP005_A549_24H:BRD-K08799216:10	BRD-K08799216
17	PD-0325901	LJP009_HEPG2_24H:BRD-K49865102:10	BRD-K49865102
18	afatinib	LJP006_A549_24H:BRD-A58767537:10	BRD-A58767537
19	selumetinib	LJP006_HEPG2_24H:BRD-K57080016:3.33	BRD-K57080016
20	alvocidib	LJP006_HME1_3H:BRD-K87909389:0.37	BRD-K87909389
21	geldanamycin	LJP006_HS578T_24H:BRD-A19500257:1.11	BRD-A19500257
22	TWS119	CPC001_HA1E_6H:BRD-K94176593:10.0	BRD-K94176593
23	curcubitacin I	CPC006_SNGM_6H:BRD-A28105619:10.0	BRD-A28105619
24	BRD-A67799922	CPC015_A549_24H:BRD-A67799922:10.0	BRD-A67799922
25	vorinostat	CPC015_A549_24H:BRD-K81418486:10.0	BRD-K81418486
26	BRD-K10995081	CPC015_HEPG2_6H:BRD-K10995081:10.0	BRD-K10995081
27	WH-4-025	LJP005_HEPG2_24H:BRD-U60236422:10	BRD-U60236422
28	PD-184352	LJP005_HEPG2_24H:BRD-K05104363:10	BRD-K05104363
29	NVP-AUY922	LJP005_HEPG2_24H:BRD-K65182930:0.37	BRD-K65182930
30	NVP-AUY922	LJP005_HEPG2_24H:BRD-K65182930:3.33	BRD-K65182930
31	dasatinib	LJP005_SKBR3_24H:BRD-K49328571:1.11	BRD-K49328571
32	PD-0325901	LJP006_HEPG2_24H:BRD-K49865102:10	BRD-K49865102
33	PD-0325901	LJP006_HEPG2_24H:BRD-K49865102:0.37	BRD-K49865102
34	PD-0325901	LJP006_HEPG2_24H:BRD-K49865102:0.04	BRD-K49865102
35	geldanamycin	LJP006_HS578T_24H:BRD-A19500257:0.37	BRD-A19500257
36	AZD-7762	LJP006_HS578T_3H:BRD-K46056750:10	BRD-K46056750
37	trichostatin A	CPC005_A549_24H:BRD-A19037878:10.0	BRD-A19037878
38	geldanamycin	CPC006_HA1E_24H:BRD-A19500257:10.0	BRD-A19500257
39	89671	CPC006_HA1E_24H:BRD-A31107743:0.09	BRD-A31107743
40	TPCA-1	CPC006_HA1E_24H:BRD-K51575138:10.0	BRD-K51575138
41	Tyrphostin AG 1478	CPC006_HA1E_24H:BRD-K68336408:56.78	BRD-K68336408
42	BRD-K54256913	CPC006_HA1E_6H:BRD-K54256913:10.0	BRD-K54256913
43	AS605240	CPC006_HEPG2_6H:BRD-K41895714:10.0	BRD-K41895714
44	CYT997	CPC006_HT29_24H:BRD-K23363278:1.0	BRD-K23363278
45	NCGC00183255-01	CPC007_HT29_24H:BRD-K26767475:10.0	BRD-K26767475
46	trichostatin A	CPC015_A549_24H:BRD-A19037878:10.0	BRD-A19037878
47	PD-0325901	LJP009_HEPG2_24H:BRD-K49865102:0.12	BRD-K49865102
48	TG-101348	LJP005_HCC515_24H:BRD-K12502280:10	BRD-K12502280
49	trametinib	LJP005_HEPG2_24H:BRD-K12343256:3.33	BRD-K12343256
50	geldanamycin	LJP005_HEPG2_24H:BRD-A19500257:3.33	BRD-A19500257
